# Supplementary material for: Dimension control on self-assembly of a crystalline core-forming polypeptoid block copolymer: 1D nanofibers versus 2D nanosheets
Source: Royal Society of Chemistry journal article supplement (doi:10.1039/d0py01673j), 2021-01-01
Supplement: d0py01673j1.pdf [file d0py01673j1.pdf]

Supporting information for manuscript entitled

Dimension Control on self-assembly of crystalline core-forming  
polypeptoid block copolymer: 1D nanofiber versus 2D nanosheet

Yuhan Wei\*, Fujun Liu, Min Li, Zhibo Li,\* Jing Sun\*

Key Laboratory of Biobased Polymer Materials, Shandong Provincial Education Department;

School of Polymer Science & Engineering, Qingdao University of Science and Technology,

Qingdao, 266042, China

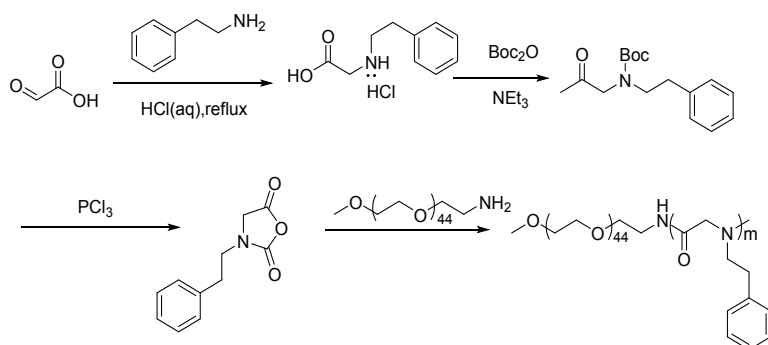

Scheme S1: Synthetic route of PEG-*b*-PNPE block copolymer.

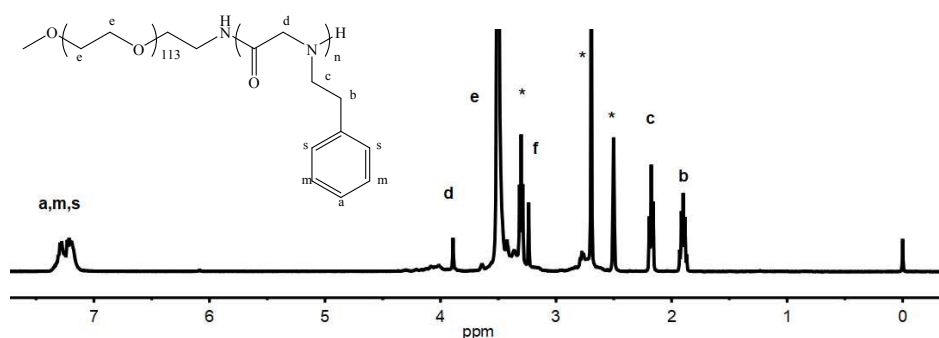

Figure S1. Representative  $^1\text{H}$ NMR spectra of PEG-*b*-PNPE.  $^1\text{H}$  NMR (500 MHz, DMSO- $d_6$ )  $\delta$  7.35 – 7.08 (m,  $-\text{C}_6\text{H}_5$ ), 3.89 – 4.30 (s,  $\text{COCH}_2\text{N}$ ), 3.50 (s,  $\text{CH}_2\text{CH}_2\text{O}$ ), 3.23 (s,  $\text{CH}_3\text{O}$ ), 2.17 (t,  $\text{NCH}_2\text{CH}_2$ ), 1.92 – 1.83 (m,  $\text{NCH}_2\text{CH}_2$ ).

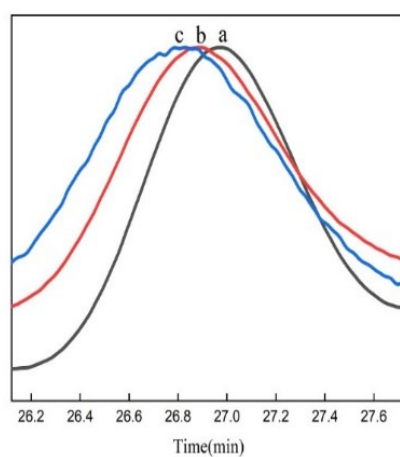

Figure S2. GPC traces of PEG<sub>113</sub>-*b*-PNPE<sub>m</sub> block copolymers, (a): PEG<sub>113</sub>-*b*-PNPE<sub>4</sub>; (b): PEG<sub>113</sub>-*b*-PNPE<sub>10</sub>, (c): PEG<sub>113</sub>-*b*-PNPE<sub>17</sub>.

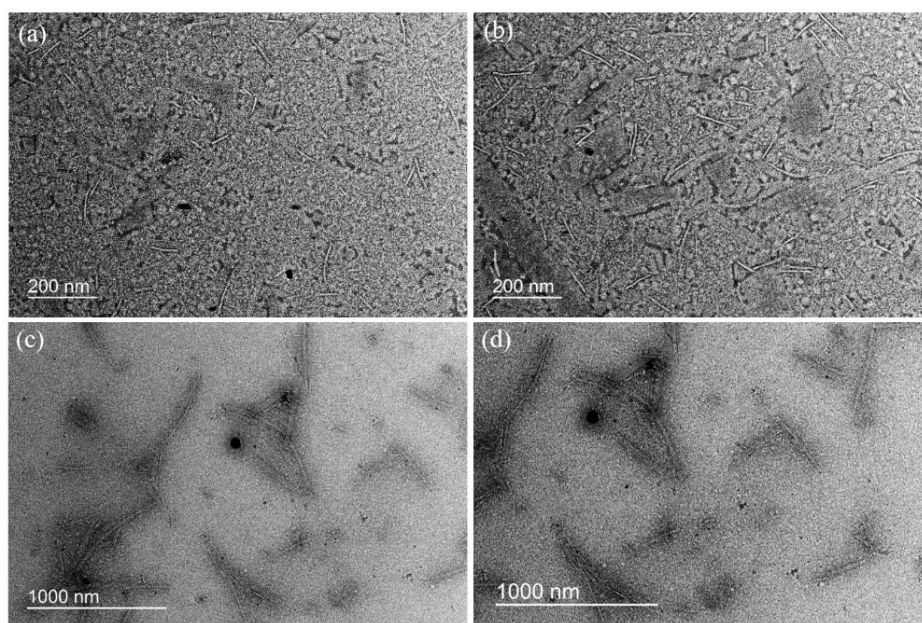

Figure S3. TEM images of the self-assembled structure of PEG<sub>44</sub>-*b*-PNPE<sub>4</sub> in deionized water quenched in liquid N<sub>2</sub> after treatment at 70 °C for 7 h.

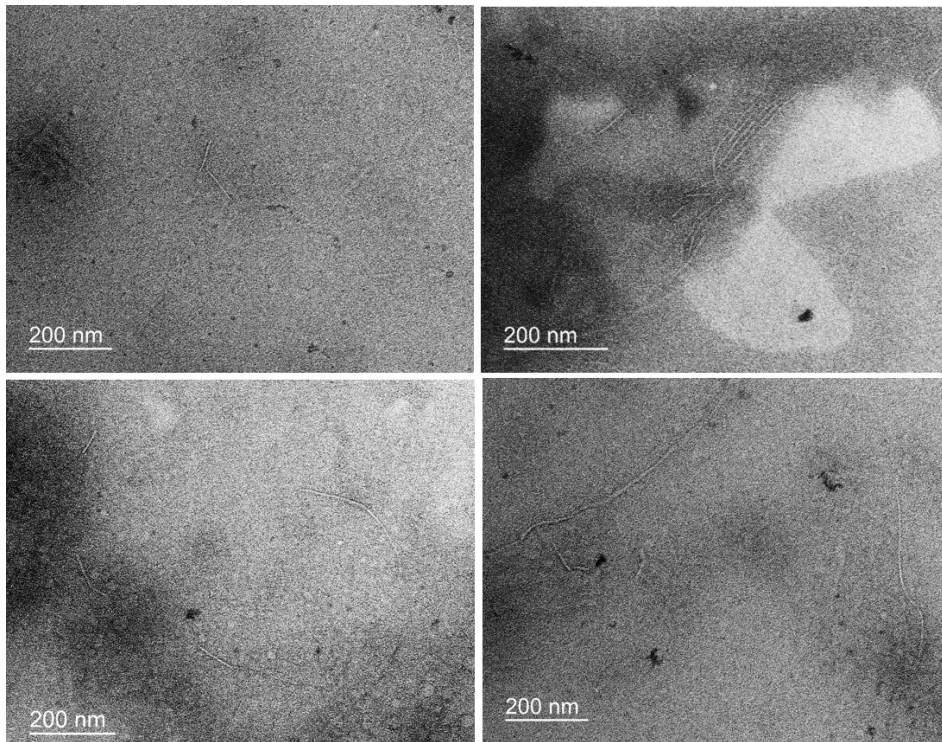

Figure S4. TEM images of the self-assembled structure of PEG<sub>44</sub>-*b*-PNPE<sub>9</sub> in deionized water quenched in liquid N<sub>2</sub> after treatment at 70 °C for 7 h.

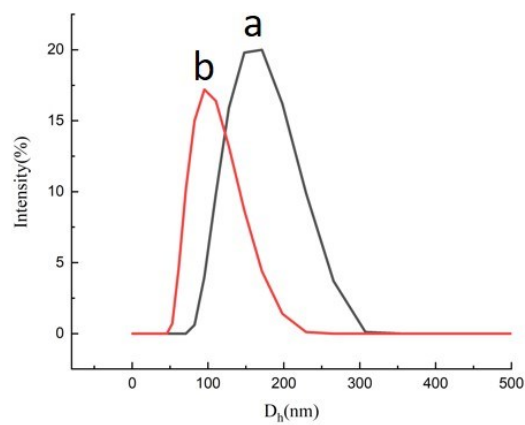

Figure S5. DLS curves of the PEG<sub>44</sub>-*b*-PNPE<sub>9</sub> in deionized water as increasing the solution temperature, (a) at room temperature, (b) at 70°C.

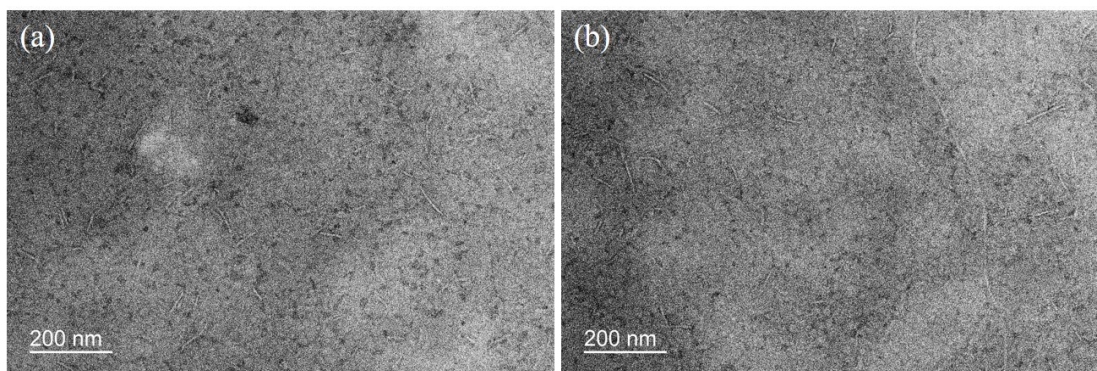

Figure S6. TEM images of the PEG<sub>44</sub>-*b*-PNPE<sub>9</sub> after dispersed in deionized water with the assist of ultrasonic unit for 20 min.

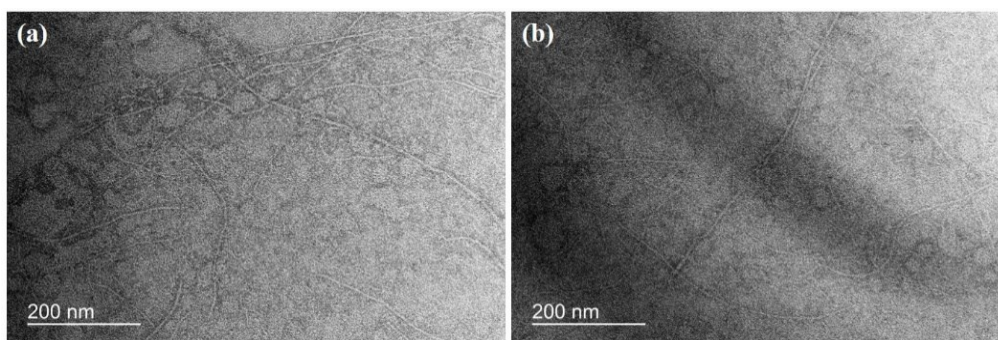

Figure S7. TEM images of the (a): PEG<sub>44</sub>-*b*-PNPE<sub>16</sub> and (b) PEG<sub>44</sub>-*b*-PNPE<sub>24</sub> after dispersed in deionized water at room temperature with the assist of ultrasonic unit.

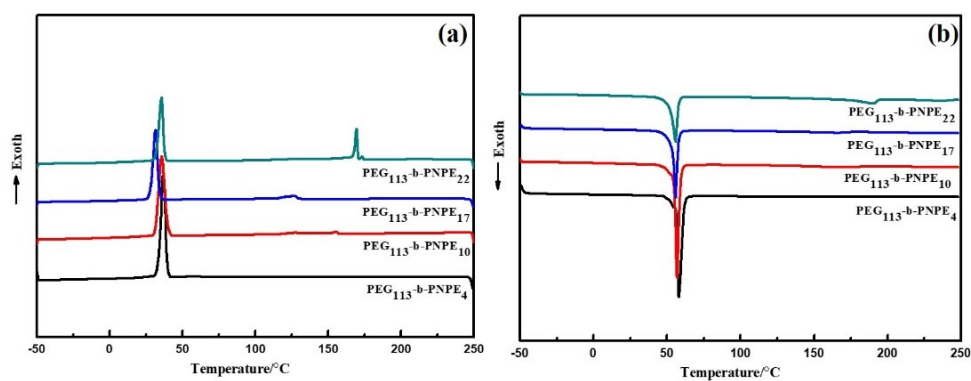

Figure S8. (a) First cooling and (b) second heating DSC curves of the four PEG<sub>113</sub>-*b*-PNPE<sub>m</sub> block polymers at 10°C/min.

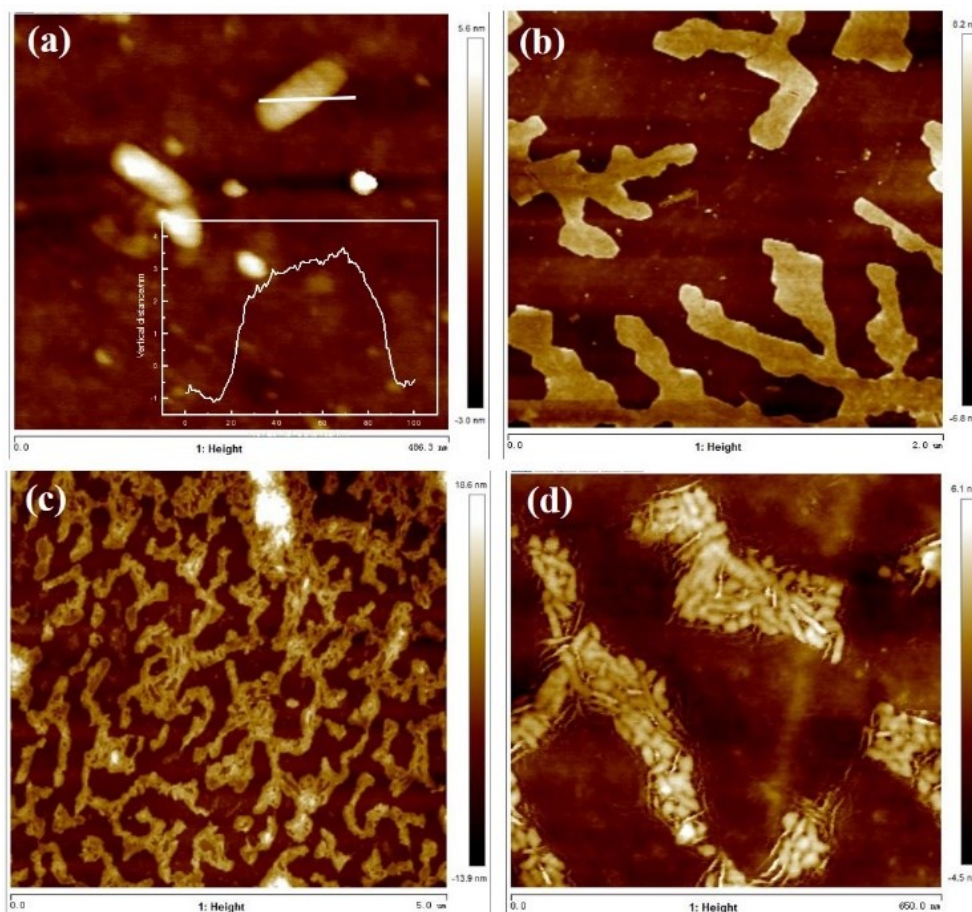

Figure S9. AFM height image of the spin-coated film from (a, b) PEG<sub>113</sub>-*b*-PNPE<sub>4</sub>, (c) PEG<sub>113</sub>-*b*-PNPE<sub>10</sub>, (d) PEG<sub>113</sub>-*b*-PNPE<sub>17</sub>. The inserted image in (a) is the respective profile image of the nanosheet indicated by the white line.

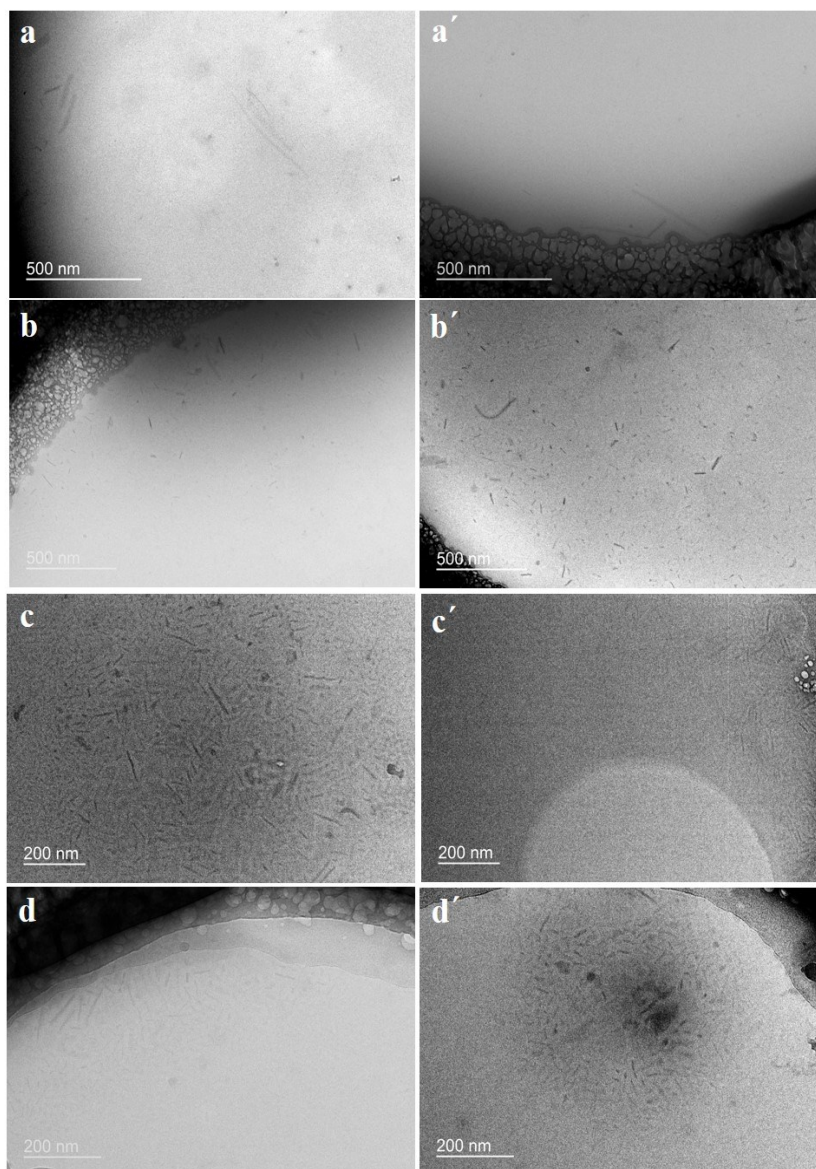

Figure S10. Cryo-TEM images of the self-assembled structure of the block copolymer (a) PEG<sub>113</sub>-*b*-PNPE<sub>4</sub> (b) PEG<sub>113</sub>-*b*-PNPE<sub>10</sub> (c) PEG<sub>113</sub>-*b*-PNPE<sub>17</sub> (d) PEG<sub>113</sub>-*b*-PNPE<sub>22</sub> in deionized water.
